# Supplementary material
Source: ML conference proceedings conference paper supplement (https://proceedings.mlr.press/v97/magnusson19a.html)
Supplement: Supplementary file [file magnusson19a-supp.pdf]

---

# Bayesian Leave-One-Out Cross-Validation for Large Data - Supplementary Material

---

Johan Jonasson<sup>1</sup> Måns Magnusson<sup>2</sup> Michael Riis Andersen<sup>2</sup> Aki Vehtari<sup>2</sup>

## 1. Proof of Proposition 1

A generic Bayesian model is considered; a sample  $(y_1, y_2, \dots, y_n)$ ,  $y_i \in \mathcal{Y} \subseteq \mathbb{R}$ , is drawn from a true density  $p_t = p(\cdot | \theta_0)$  for some true parameter  $\theta_0$ . The parameter  $\theta_0$  is assumed to be drawn from a prior  $p(\theta)$  on the parameter space  $\Theta$ , which we assume to be an open and bounded subset of  $\mathbb{R}^d$ .

A number of conditions are used. They are as follows.

- (i) the likelihood  $p(y|\theta)$  satisfies that there is a function  $C : \mathcal{Y} \rightarrow \mathbb{R}_+$ , such that  $\mathbb{E}_{y \sim p_t}[C(y)^2] < \infty$  and such that for all  $\theta_1$  and  $\theta_2$ ,  $|p(y|\theta_1) - p(y|\theta_2)| \leq C(y)p(y|\theta_2)\|\theta_1 - \theta_2\|$ .
- (ii)  $p(y|\theta) > 0$  for all  $(y, \theta) \in \mathcal{Y} \times \Theta$ ,
- (iii) There is a constant  $M < \infty$  such that  $p(y|\theta) < M$  for all  $(y, \theta)$ ,
- (iv) all assumptions needed in the Bernstein-von Mises (BvM) Theorem (Walker, 1969),
- (v) for all  $\theta$ ,  $\int_{\mathcal{Y}} (-\log p(y|\theta))p(y|\theta)dy < \infty$ .

### Remarks.

- There are alternatives or relaxations to (i) that also work. One is to assume that there is an  $\alpha > 0$  and  $C$  with  $\mathbb{E}_y[C(y)^2] < \infty$  such that  $|p(y|\theta_1) - p(y|\theta_2)| \leq C(y)p(y|\theta_2)\|\theta_1 - \theta_2\|^\alpha$ . There are many examples when (i) holds, e.g. when  $y$  is normal, Laplace distributed or Cauchy distributed with  $\theta$  as a one-dimensional location parameter.
- The assumption that  $\Theta$  is bounded will be used solely to draw the conclusion that  $\mathbb{E}_{y, \theta} \|\theta - \theta_0\| \rightarrow 0$  as  $n \rightarrow$

$\infty$ , where  $y$  is the sample and  $\theta$  is either distributed according to the true posterior (which is consistent by BvM) or according to a consistent approximate posterior. The conclusion is valid by the definition of consistency and the fact that the boundedness of  $\Theta$  makes  $\|\theta - \theta_0\|$  a bounded function of  $\theta$ . If it can be shown by other means for special cases that  $\mathbb{E}_{y, \theta} \|\theta - \theta_0\| \rightarrow 0$  despite  $\Theta$  being unbounded, then our results also hold.

- We can (and will) without loss of generality assume that  $M = 1/2$  is sufficient in (iii), for if not then simply transform data and consider  $z_i = 2My_i$  instead of  $y_i$ .

The main quantity of interest is the mean expected log pointwise predictive density, which we want to use for model evaluation and comparison.

**Definition 1** ( $\overline{\text{elpd}}$ ). *The mean expected log pointwise predictive density for a model  $p$  is defined as*

$$\overline{\text{elpd}} = \int p_t(x) \log p(x) dx$$

where  $p_t(x) = p(x|\theta_0)$  is the true density at a new unseen observation  $x$  and  $\log p(x)$  is the log predictive density for observation  $x$ .

We estimate  $\overline{\text{elpd}}$  using *leave-one-out cross-validation* (*loo*).

**Definition 2** (Leave-one-out cross-validation). *The loo estimator  $\overline{\text{elpd}}_{loo}$  is given by*

$$\overline{\text{elpd}}_{loo} = \frac{1}{n} \sum_{i=1}^n \log p(y_i | y_{-i}), \quad (1)$$

where  $p(y_i | y_{-i}) = \int p(y_i | \theta) p(\theta | y_{-i}) d\theta$ .

To estimate  $\overline{\text{elpd}}_{loo}$  in turn, we use importance sampling and the Hansen-Hurwitz estimator. Definitions follow.

**Definition 3.** *The Hansen-Hurwitz estimator is given by*

$$\widehat{\overline{\text{elpd}}}_{loo}(m, q) = \frac{1}{m} \frac{1}{n} \sum_{j=1}^m \frac{1}{\tilde{\pi}_j} \log \hat{p}(y_j | y_{-j})$$

---

<sup>\*</sup>Equal contribution <sup>1</sup>Department of Mathematical Sciences, Chalmers University of Technology and University of Gothenburg, Sweden <sup>2</sup>Department of Computer Science, Aalto University, Finland. Correspondence to: Måns Magnusson <mans.magnusson@aalto.fi>.

where  $\tilde{\pi}_i$  is the probability of subsampling observation  $i$ ,  $\log \hat{p}(y_i|y_{-i})$  is the (self-normalized) importance sampling estimate of  $\log p(y_i|y_{-i})$  defined as

$$\log \hat{p}(y_i|y_{-i}) = \log \left( \frac{\frac{1}{S} \sum_{s=1}^S p(y_i|\theta_s) r(\theta_s)}{\frac{1}{S} \sum_{s=1}^S r(\theta_s)} \right),$$

where

$$\begin{aligned} r(\theta_s) &= \frac{p(\theta_s|y_{-i}) p(\theta_s|y)}{p(\theta_s|y) q(\theta_s|y)} \\ &\propto \frac{1}{p(y_i|\theta_s)} \frac{p(\theta_s|y)}{q(\theta_s|y)} \end{aligned}$$

and where  $q(\theta|y)$  is an approximation of the posterior distribution,  $\theta_s$  is a sample from the approximate posterior distribution  $q(\theta|y)$  and  $S$  is the total posterior sample size.

**Proposition 1.** Let the subsampling size  $m$  and the number of posterior draws  $S$  be fixed at arbitrary integer numbers, let the sample size  $n$  grow, assume that (i)-(vi) hold and let  $q = q_n(\cdot|y)$  be any consistent approximate posterior. Write  $\hat{\theta}_q = \arg \max\{q(\theta) : \theta \in \Theta\}$  and assume further that  $\hat{\theta}_q$  is a consistent estimator of  $\theta_0$ . Then

$$|\widehat{\text{elpd}}_{\text{loo}}(m, q) - \overline{\text{elpd}}_{\text{loo}}| \rightarrow 0$$

in probability as  $n \rightarrow \infty$  for any of the following choices of  $\pi_i$ ,  $i = 1, \dots, n$ .

- (a)  $\pi_i = -\log p(y_i|y)$ ,
- (b)  $\pi_i = -\mathbb{E}_y[\log p(y_i|y)]$ ,
- (c)  $\pi_i = -\mathbb{E}_{\theta \sim q}[\log p(y_i|\theta)]$ ,
- (d)  $\pi_i = -\log p(y_i|\mathbb{E}_{\theta \sim q}[\theta])$ ,
- (e)  $\pi_i = -\log p(y_i|\hat{\theta}_q)$ .

*Remark.* By the variational BvM Theorems of Wang and Blei, (Wang & Blei, 2018),  $q$  can be taken to be either  $q_{Lap}$ ,  $q_{MF}$  or  $q_{FR}$ , i.e. the approximate posteriors of the Laplace, mean-field or full-rank variational families respectively in Proposition 1, provided that one adopts the mild conditions in their paper.

The proof of Proposition 1 will be focused on proving (a) and then (b)-(e) will follow easily. We begin with the following key lemma.

**Lemma 2.** With all quantities as defined above,

$$\mathbb{E}_{y \sim p_t} |\pi_i - \log p(y_i|\theta_0)| \rightarrow 0, \quad (2)$$

with any of the definitions (a)-(e) of  $\pi_i$  of Proposition 1. Furthermore,

$$\mathbb{E}_{y \sim p_t} |\log p(y_i|y_{-i}) - \log p(y_i|\theta_0)| \rightarrow 0, \quad (3)$$

and

$$\mathbb{E}_{y \sim p_t} |\log \hat{p}(y_i|y) - \log p(y_i|\theta_0)| \rightarrow 0. \quad (4)$$

as  $n \rightarrow \infty$ .

*Proof.* To avoid burdening the notation unnecessarily, we write throughout the proof  $\mathbb{E}_y$  for  $\mathbb{E}_{y \sim p_t}$ . For now, we also write  $\mathbb{E}_\theta$  as shorthand for  $\mathbb{E}_{\theta \sim p(\cdot|y_{-i})}$ . Recall that  $x_+ = \max(x, 0) = \text{ReLU}(x)$ .

Hence

$$\begin{aligned} &\mathbb{E}_y \left[ \left( \log \frac{p(y_i|y_{-i})}{p(y_i|\theta_0)} \right)_+ \right] \\ &= \mathbb{E}_y \left[ \left( \log \frac{\mathbb{E}_\theta [p(y_i|\theta)]}{p(y_i|\theta_0)} \right)_+ \right] \\ &\leq \mathbb{E}_y \left[ \log \left( 1 + \frac{\mathbb{E}_\theta [C(y_i)p(y_i|\theta_0)\|\theta - \theta_0\|]}{p(y_i|\theta_0)} \right) \right] \\ &\leq \mathbb{E}_{y,\theta} [C(y_i)\|\theta - \theta_0\|] \\ &\leq (\mathbb{E}_{y_i} [C(y_i)^2] \mathbb{E}_{y,\theta} [\|\theta - \theta_0\|^2])^{1/2} \\ &\rightarrow 0 \text{ as } n \rightarrow \infty. \end{aligned}$$

Here the first inequality follows from condition (i) and the second inequality from the fact that  $\log(1+x) < x$  for  $x \geq 0$ . The third inequality is Schwarz inequality. The limit conclusion follows from the consistency of the posterior  $p(\cdot|y_{-i})$  and the definition of weak convergence, since  $\|\theta - \theta_0\|^2$  is a continuous bounded function of  $\theta$  (recall that  $\Theta$  is bounded) and that the first factor is finite by condition (i).

For the reverse inequality,

$$\begin{aligned} &\mathbb{E}_y \left[ \left( \log \frac{p(y_i|\theta_0)}{p(y_i|y_{-i})} \right)_+ \right] \\ &= \mathbb{E}_y \left[ \left( \log \mathbb{E}_\theta \left[ \frac{p(y_i|\theta_0)}{p(y_i|\theta)} \right] \right)_+ \right] \\ &\leq \mathbb{E}_y \left[ \log \left( 1 + \mathbb{E}_\theta \left[ \frac{C(y_i)p(y_i|\theta)\|\theta - \theta_0\|}{p(y_i|\theta)} \right] \right) \right] \\ &\leq (\mathbb{E}_{y_i} [C(y_i)^2] \mathbb{E}_{y,\theta} [\|\theta - \theta_0\|^2])^{1/2} \\ &\rightarrow 0 \text{ as } n \rightarrow \infty. \end{aligned}$$

This proves (3) and an identical argument proves (2) for  $\pi_i = p(y_i|y)$ .

For  $\pi_i = -\mathbb{E}_y[\log p(y_i|y)]$ , note first that

$$\begin{aligned} & \mathbb{E}_y |\mathbb{E}_y[\log p(y_i|y)] - \mathbb{E}_y[\log p(y_i|y_{-i})]| \\ &= |\mathbb{E}_y[\log p(y_i|y) - \log p(y_i|y_{-i})]| \\ &\leq \mathbb{E}_y |\log p(y_i|y) - \log p(y_i|y_{-i})| \end{aligned}$$

which goes to 0 by (3) and (a). Hence we can replace  $\pi_i = -\mathbb{E}[\log p(y_i|y)]$  with  $\pi_i = -\mathbb{E}[\log p(y_i|y_{-i})]$  when proving (b). To that end, observe that

$$\begin{aligned} & (\mathbb{E}_y[\log p(y_i|y_{-i})] - \log p(y_i|\theta_0))_+ \\ &= \left( \mathbb{E}_{y_i} \left[ \mathbb{E}_{y_{-i}} \left[ \log \frac{p(y_i|y_{-i})}{p(y_i|\theta_0)} \right] \right] \right)_+ \\ &\leq \mathbb{E}_y \left[ \left( \log \frac{p(y_i|y_{-i})}{p(y_i|\theta_0)} \right)_+ \right]. \end{aligned}$$

where the inequality is Jensen's inequality used twice on the convex function  $x \rightarrow x_+$ . Now everything is identical to the proof of (3) and the reverse inequality is analogous.

The other choices of  $\pi_i$  follow along very similar lines. For  $\pi_i = -\log p(y_i|\hat{\theta}_q)$ , we have on mimicking the above that

$$\begin{aligned} & \mathbb{E}_y \left[ \left( \log \frac{p(y_i|\hat{\theta}_q)}{p(y_i|\theta_0)} \right)_+ \right] \\ &\leq \left( \mathbb{E}_{y_i} [C(y_i)^2] \mathbb{E}_y [\|\hat{\theta}_q - \theta_0\|^2] \right)^{1/2} \end{aligned}$$

and  $\mathbb{E}_y [\|\hat{\theta}_q - \theta_0\|^2] \rightarrow 0$  as  $n \rightarrow \infty$  by the assumed consistency of  $\hat{\theta}_q$ . The reverse inequality is analogous and (2) for  $\pi_i = p(y_i|\hat{\theta}_q)$  is established.

For the case  $\pi_i = -\log p(y_i|\mathbb{E}_{\theta \sim q} \theta)$ , the analogous analysis gives

$$\begin{aligned} & \mathbb{E}_y \left[ \left( \log \frac{p(y_i|\mathbb{E}_{\theta \sim q} \theta)}{p(y_i|\theta_0)} \right)_+ \right] \\ &\leq \mathbb{E}_{y_i} [C(y_i)^2] \mathbb{E}_y [\|\mathbb{E}_{\theta \sim q} \theta - \theta_0\|^2]. \end{aligned}$$

Since  $x \rightarrow \|x - \theta_0\|^2$  is convex, the second factor on the right hand side is bounded by  $\mathbb{E}_{y, \theta \sim q} [\|\theta - \theta_0\|^2]$  which goes to 0 by the consistency of  $q$  and the boundedness of  $\Theta$ . The reverse inequality is again analogous.

Finally for  $\pi_i = -\mathbb{E}_{\theta \sim q} [\log p(y_i|\theta)]$ ,

$$\begin{aligned} & \mathbb{E}_y \left[ (\mathbb{E}_{\theta \sim q} [\log p(y_i|\theta)] - \log p(y_i|\theta_0))_+ \right] \\ &= \mathbb{E}_y \left[ \left( \mathbb{E}_{\theta \sim q} \left[ \log \frac{p(y_i|\theta)}{p(y_i|\theta_0)} \right] \right)_+ \right] \\ &\leq \mathbb{E}_{y, \theta \sim q} \left[ \left( \log \frac{p(y_i|\theta)}{p(y_i|\theta_0)} \right)_+ \right] \\ &\leq \left( \mathbb{E}_{y_i} [C(y_i)^2] \mathbb{E}_{y, \theta \sim q} [\|\theta - \theta_0\|^2] \right)^{1/2} \rightarrow 0 \end{aligned}$$

as  $n \rightarrow \infty$  by the consistency of  $q$ . Here the first inequality is Jensen's inequality applied to  $x \rightarrow x_+$  and the second inequality follows along the same lines as before.

For (4), write  $r'(\theta_s) = r(\theta_s) / \sum_{j=1}^S r(\theta_j)$  for the random weights given to the individual  $\theta_s$ 's in the expression for  $\hat{p}(y_i|y_{-i})$ . Then we have, with  $\theta = (\theta_1, \dots, \theta_S)$  chosen according to  $q$ ,

$$\begin{aligned} & \mathbb{E}_y \left[ \left( \log \frac{\hat{p}(y_i|y_{-i})}{p(y_i|\theta_0)} \right)_+ \right] \\ &= \mathbb{E}_{y, \theta} \left[ \left( \log \frac{\sum_{s=1}^S r'(\theta_s) p(y_i|\theta_s)}{p(y_i|\theta_0)} \right)_+ \right] \\ &\leq \mathbb{E}_{y, \theta} \left[ \log \left( 1 + \frac{\sum_{s=1}^S r'(\theta_s) |p(y_i|\theta_s) - p(y_i|\theta_0)|}{p(y_i|\theta_0)} \right) \right] \\ &\leq \mathbb{E}_{y, \theta} \left[ \log \left( 1 + C(y_i) \sum_{s=1}^S r'(\theta_s) \|\theta_s - \theta_0\| \right) \right] \\ &\leq \mathbb{E}_{y, \theta} \left[ \log \left( 1 + C(y_i) \sum_{s=1}^S \|\theta_s - \theta_0\| \right) \right] \\ &\leq \mathbb{E}_{y, \theta} \left[ C(y_i) \sum_{s=1}^S \|\theta_s - \theta_0\| \right] \\ &\leq \left( \mathbb{E}_{y_i} [C(y_i)^2] \mathbb{E}_{y, \theta} \left[ \left( \sum_{s=1}^S \|\theta_s - \theta_0\| \right)^2 \right] \right)^{1/2}, \end{aligned}$$

where the second inequality is condition (i) and the limit conclusion follows from the consistency of  $q$ . For the reverse inequality to go through analogously, observe that

$$\begin{aligned} & \frac{|p(y_i|\theta_0) - \sum_s r'(\theta_s) p(y_i|\theta_s)|}{\sum_s r'(\theta_s) p(y_i|\theta_s)} \\ &\leq \frac{\sum_s r'(\theta_s) |p(y_i|\theta_s) - p(y_i|\theta_0)|}{\sum_s r'(\theta_s) p(y_i|\theta_s)} \\ &\leq \frac{\sum_s r'(\theta_s) p(y_i|\theta_s) \|\theta_s - \theta_0\|}{\sum_s r'(\theta_s) p(y_i|\theta_s)} \\ &\leq \max_s \|\theta_s - \theta_0\| \\ &\leq \sum_s \|\theta_s - \theta_0\|. \end{aligned}$$

Equipped with this observation, mimic the above.  $\square$

For convenience we will write  $\hat{e} := \hat{e}_{m,q} = \widehat{\text{elpd}}_{loo}$ , which for our purposes is more usefully expressed as

$$\hat{e} = \frac{1}{n} \frac{1}{m} \sum_{i=1}^n \sum_{j=1}^m I_{ij} \frac{1}{\pi_i} \log \hat{p}(y_i|y_{-i}),$$

where  $I_{ij}$  is the indicator that sample point  $y_i$  is chosen in draw  $j$  for the subsample used in  $\hat{e}$ . Write also

$$e = \frac{1}{n} \frac{1}{m} \sum_{i=1}^n \sum_{j=1}^m I_{ij} \frac{1}{\pi_i} \log p(y_i | y_{-i}).$$

In other words,  $e$  is the HH estimator with  $\hat{p}$  replaced with  $p$ .

**Lemma 3.** *With the notation as just defined and  $\pi_i = -\log p(y_i | y)$ ,*

$$\mathbb{E}|\hat{e} - e| \rightarrow 0$$

as  $n \rightarrow \infty$ .

*Proof.* We have, with expectations with respect to all sources of randomness involved in  $\hat{e}$  and  $e$

$$\begin{aligned} & \mathbb{E}|\hat{e} - e| \\ & \leq \frac{1}{m} \frac{1}{n} \sum_{i=1}^n \sum_{j=1}^m \mathbb{E} \left[ \mathbb{E} \left[ I_{ij} \frac{1}{\pi_i} \left| \log \hat{p}(y_i | y_{-i}) - \log p(y_i | y_{-i}) \right| \middle| y \right] \right] \\ & = \mathbb{E} \left[ \frac{1}{n} \frac{1}{m} \sum_{i=1}^n \sum_{j=1}^m \left| \log \hat{p}(y_i | y_{-i}) - \log p(y_i | y_{-i}) \right| \right] \\ & = \mathbb{E} \left| \log \hat{p}(y_i | y_{-i}) - \log p(y_i | y_{-i}) \right|. \end{aligned}$$

The result now follows from (3), (4) and the triangle inequality.  $\square$

*Proof of Proposition 1.* As stated before, we start with a focus on (a), which means that for now we have  $\pi_i = -\log p(y_i | y)$ . By Lemma 3, it suffices to prove that  $|e - \overline{\text{elpd}}_{\text{loo}}| \rightarrow 0$  in probability with  $\pi_i$  chosen according to any of (a)-(e). The variance of a HH estimator is well known and some easy manipulation then tells us that the conditional variance of  $e$  given  $y$  is given by

$$V(e) = \text{Var}(e|y) = \frac{1}{n^2} \frac{1}{m} (S_p S_2 - S_p^2),$$

where  $S_p = \sum_{i=1}^n p_i$ ,  $S_\pi = \sum_{i=1}^n \pi_i$  and  $S_2 = \sum_{i=1}^n (p_i^2 / \pi_i)$ . We claim that for any  $\delta > 0$ , for  $n$  sufficiently large,  $\mathbb{P}_y(V(e) < \delta) > 1 - \delta$ . To this end, observe first that

$$\begin{aligned} & \mathbb{E}_y[-\log p(y_i | y)] \\ & \leq \mathbb{E}_y[-\log p(y_i | \theta_0)] + \mathbb{E}_y |\log p(y_i | y) - \log p(y_i | \theta_0)| \\ & \leq \mathbb{E}_y[-\log p(y_i | \theta_0)] + \delta < \infty \end{aligned}$$

for sufficiently large  $n$ , since the first term is finite by condition (v). Let  $A = A_n = \mathbb{E}_y[-\log p(y_i | y)]$ .

Now,

$$\mathbb{E}_y \left[ \frac{1}{n} |S_p - S_\pi| \right] = \mathbb{E}_y \left[ \frac{1}{n} \left| \sum_{i=1}^n \pi_i - \sum_{i=1}^n p_i \right| \right] \rightarrow 0$$

as  $n \rightarrow \infty$  by (2) and (3). Hence for arbitrary  $\alpha > 0$ ,  $\mathbb{P}_y(|S_p - S_\pi| < \alpha^2 n) > 1 - \alpha$  for  $n$  large enough. Also

$$\frac{p_i^2}{\pi_i} \leq \frac{(\pi_i + |p_i - \pi_i|)^2}{\pi_i} < \pi_i + 4|p_i - \pi_i|$$

(the last inequality using condition (iii):  $\pi_i \geq -\log(1/2) > 1/2$ ), so  $n^{-1} \mathbb{E}_y |S_\pi - S_2| \rightarrow 0$  and so  $\mathbb{P}_y(|S_p - S_2| < \alpha^2 n) > 1 - \alpha$  for sufficiently large  $n$ . Hence with probability exceeding  $1 - 2\alpha$ ,  $y$  will be such that for sufficiently large  $n$ ,

$$\begin{aligned} V(e) & \leq \frac{1}{n^2} \frac{1}{m} ((S_p + \alpha^2 n)^2 - S_p^2) \\ & = \frac{1}{n^2} \frac{1}{m} (2\alpha^2 n S_p + \alpha^4 n^2). \end{aligned}$$

We had  $\mathbb{E}_y[S_p] = An$  and Markov's inequality thus entails that  $\mathbb{P}_y(S_p < An/\alpha) > 1 - \alpha$ . Adding this piece of information to the above, we get that with probability larger than  $1 - 3\alpha$ ,  $y$  will for sufficiently large  $n$  be such that

$$V(e) \leq (2\alpha + \alpha^4)n^2 < 3\alpha.$$

For such  $y$ , Chebyshev's inequality gives

$$\mathbb{P}(|e - \mathbb{E}[e|y]| > \alpha^{1/2}|y|) < 3\alpha^{1/2}.$$

The HH estimator is unbiased, so  $\mathbb{E}[e|y] = \overline{\text{elpd}}_{\text{loo}}$ . We get for arbitrary  $\epsilon > 0$  on taking  $\alpha$  sufficiently small and  $n$  correspondingly large, taking all randomness into account

$$\mathbb{P}(|e - \overline{\text{elpd}}_{\text{loo}}| > \epsilon) < 1 - \epsilon$$

which entails that  $|e - \overline{\text{elpd}}_{\text{loo}}| \rightarrow 0$  in probability. As observed above, this proves (a).

For the remaining parts, write  $e_p$  when taking  $\pi_i$  in  $e$  according to statement (p) in the proposition. By (2),  $\mathbb{E}|e_p - e_a| \rightarrow 0$  for  $p = b, c, d, e$  and we are done.  $\square$

## References

- Walker, A. M. On the asymptotic behaviour of posterior distributions. *Journal of the Royal Statistical Society. Series B (Methodological)*, pp. 80–88, 1969.
- Wang, Y. and Blei, D. M. Frequentist consistency of variational Bayes. *Journal of the American Statistical Association*, (just-accepted):1–85, 2018.

## 2. Unbiasness of Using the Hansen-Hurwitz Estimator

### 2.1. On the Hansen-Hurwitz Estimator

Let  $\mathcal{Y} = \{y_1, y_2, \dots, y_N\}$  be a set of non-negative observations,  $y_i > 0$  and let  $\pi = \{\pi_1, \pi_2, \dots, \pi_N\}$  be a probability vector s.t.  $\sum \pi_j = 1$ . Furthermore, let  $a_k \in \{1, 2, \dots, N\}$  be i.i.d. samples from a multinomial distribution with probabilities  $\pi$ , i.e.  $a_k \stackrel{iid}{\sim} \text{Multinomial}(\pi)$ .

We want to estimate the total

$$\tau = \sum_{n=1}^N y_n \quad (5)$$

using the Hansen-Hurwitz estimator given by

$$\hat{\tau} = \frac{1}{M} \sum_{m=1}^M \frac{x_m}{p_m}, \quad (6)$$

where  $x_m \equiv y_{a_m}$ ,  $p_m \equiv \pi_{a_m}$ , and  $a_m \sim \text{Multinomial}(\pi)$ .

We can decompose  $x_m$  and  $p_m$  as follows

$$x_m \equiv y_{a_m} = \sum_{j=1}^N \mathbb{I}[a_m = j] y_j \quad (7)$$

$$p_m \equiv p_{a_m} = \sum_{j=1}^N \mathbb{I}[a_m = j] \pi_j \quad (8)$$

### 2.2. The Hansen-Hurwitz Estimator is Unbiased

First, we will show that the HH estimator,  $\hat{\tau}$ , is unbiased. We have,

$$\mathbb{E}[\hat{\tau}] = \mathbb{E}\left[\frac{1}{M} \sum_{m=1}^M \frac{x_m}{p_m}\right] = \frac{1}{M} \sum_{m=1}^M \mathbb{E}\left[\frac{x_m}{p_m}\right] \quad (9)$$

Using the definitions in eq. (7) and (8) yields

$$\begin{aligned} \mathbb{E}[\hat{\tau}] &= \frac{1}{M} \sum_{m=1}^M \mathbb{E}\left[\frac{\sum_{j=1}^N \mathbb{I}[a_m = j] y_j}{\sum_{j=1}^N \mathbb{I}[a_m = j] \pi_j}\right] \\ &= \frac{1}{M} \sum_{m=1}^M \mathbb{E}\left[\sum_{j=1}^N \frac{y_j}{\pi_j} \mathbb{I}[a_m = j]\right] \\ &= \frac{1}{M} \sum_{m=1}^M \sum_{j=1}^N \frac{y_j}{\pi_j} \mathbb{E}[\mathbb{I}[a_m = j]] \\ &= \frac{1}{M} \sum_{m=1}^M \sum_{j=1}^N \frac{y_j}{\pi_j} \pi_j \end{aligned} \quad (10)$$

since  $\pi_j = \mathbb{P}[a_m = j] = \mathbb{E}[\mathbb{I}[a_m = j]]$ .

Now it follows that

$$\mathbb{E}[\hat{\tau}] = \frac{1}{M} \sum_{m=1}^M \sum_{j=1}^N y_j = \sum_{j=1}^N y_j = \tau. \quad (11)$$

### 2.3. An Unbiased Estimator of $\sigma_{\text{loo}}^2$

We also want to estimate the variance of the population  $\mathcal{Y}$ , i.e.

$$\sigma_y^2 = \frac{1}{N} \sum_{n=1}^N (y_n - \bar{y})^2, \quad (12)$$

where  $\bar{y} = \frac{1}{N} \sum y_n$ .

First, we decompose the above as follows

$$\sigma_y^2 = \frac{1}{N} \sum_{n=1}^N y_n^2 - \bar{y}^2. \quad (13)$$

We will consider estimators for the two terms,  $\frac{1}{N} \sum_{n=1}^N y_n^2$  (1) and  $\bar{y}^2$  (2), separately. First, we will show that the following is an unbiased estimate of the first term,

$$T_1 = \frac{1}{NM} \sum_{m=1}^M \frac{x_m^2}{p_m}. \quad (14)$$

We have

$$\mathbb{E}[T_1] = \mathbb{E}\left[\frac{1}{NM} \sum_{m=1}^M \frac{x_m^2}{p_m}\right] = \frac{1}{NM} \sum_{m=1}^M \mathbb{E}\left[\frac{x_m^2}{p_m}\right] \quad (15)$$

Again, we use the representations in eq. (7) and (8) to get

$$\begin{aligned} \mathbb{E}\left[\frac{1}{NM} \sum_{m=1}^M \frac{x_m^2}{p_m}\right] &= \frac{1}{NM} \sum_{m=1}^M \mathbb{E}\left[\frac{\sum_{j=1}^N \mathbb{I}[a_m = j] y_j^2}{\sum_{j=1}^N \mathbb{I}[a_m = j] \pi_j}\right] \\ &= \frac{1}{NM} \sum_{m=1}^M \mathbb{E}\left[\sum_{j=1}^N \mathbb{I}[a_m = j] \frac{y_j^2}{\pi_j}\right] \\ &= \frac{1}{NM} \sum_{m=1}^M \sum_{j=1}^N \frac{y_j^2}{\pi_j} \mathbb{E}[\mathbb{I}[a_m = j]] \\ &= \frac{1}{NM} \sum_{m=1}^M \sum_{j=1}^N \frac{y_j^2}{\pi_j} \pi_j \\ &= \frac{1}{N} \sum_{j=1}^N y_j^2. \end{aligned} \quad (16)$$

This completes the proof of for the first term.

For the second term, we use the estimator  $T_2$  given by

$$T_2 = \frac{1}{M(M-1)} \sum_{m=1}^M \left[ \frac{x_m}{Np_m} - \frac{1}{N} \sum_{k=1}^M \frac{x_k}{Mp_k} \right]^2 - \left[ \frac{1}{N} \sum_{k=1}^M \frac{x_k}{Mp_k} \right]^2. \quad (17)$$

We have

$$\begin{aligned} & \frac{1}{M(M-1)} \sum_{m=1}^M \left[ \frac{x_m}{Np_m} - \sum_{k=1}^M \frac{x_k}{NMp_k} \right]^2 - \left[ \sum_{k=1}^M \frac{x_k}{NMp_k} \right]^2 \\ &= \frac{1}{N^2M(M-1)} \sum_{m=1}^M \frac{x_m^2}{p_m^2} - \frac{1}{N^2M(M-1)} \left[ \sum_{k=1}^M \frac{x_k}{p_k} \right]^2 \end{aligned} \quad (18)$$

We consider now the expectation of the first term in the equation above

$$\begin{aligned} \mathbb{E} \left[ \sum_{m=1}^M \frac{x_m^2}{p_m^2} \right] &= \sum_{m=1}^M \mathbb{E} \left[ \frac{x_m^2}{p_m^2} \right] \\ &= \sum_{m=1}^M \mathbb{E} \left[ \frac{\sum_{j=1}^N \mathbb{I}[a_m = j] y_j^2}{\sum_{j=1}^N \mathbb{I}[a_m = j] \pi_j^2} \right] \\ &= \sum_{m=1}^M \mathbb{E} \left[ \sum_{j=1}^N \mathbb{I}[a_m = j] \frac{y_j^2}{\pi_j^2} \right] \\ &= \sum_{m=1}^M \sum_{j=1}^N \mathbb{E} [\mathbb{I}[a_m = j]] \frac{y_j^2}{\pi_j^2} \\ &= M \sum_{j=1}^N \frac{y_j^2}{\pi_j} \end{aligned} \quad (19)$$

and the second term

$$\begin{aligned} \mathbb{E} \left[ \left[ \sum_{k=1}^M \frac{x_k}{p_k} \right]^2 \right] &= \mathbb{E} \left[ \sum_{k=1}^M \sum_{j=1}^M \frac{x_k x_j}{p_k p_j} \right] \\ &= \sum_{k=1}^M \sum_{j=1}^M \mathbb{E} \left[ \frac{x_k x_j}{p_k p_j} \right] \\ &= \sum_{j \neq k}^M \mathbb{E} \left[ \frac{x_k x_j}{p_k p_j} \right] + \sum_{k=1}^M \mathbb{E} \left[ \frac{x_k^2}{p_k^2} \right] \\ &= \sum_{j \neq k}^M \mathbb{E} \left[ \frac{x_k}{p_k} \right] \mathbb{E} \left[ \frac{x_j}{p_j} \right] + \sum_{k=1}^M \sum_{j=1}^N \frac{y_j^2}{\pi_j} \\ &= \sum_{j \neq k}^M \mathbb{E} \left[ \frac{x_k}{p_k} \right] \mathbb{E} \left[ \frac{x_j}{p_j} \right] + M \sum_{j=1}^N \frac{y_j^2}{\pi_j} \\ &= M(M-1)\tau^2 + M \sum_{j=1}^N \frac{y_j^2}{\pi_j}. \end{aligned} \quad (20)$$

Substituting back, we get

$$\begin{aligned} & \frac{1}{M(M-1)} \sum_{m=1}^M \left[ \frac{x_m}{Np_m} - \frac{1}{N} \sum_{k=1}^M \frac{x_k}{Mp_k} \right]^2 - \left[ \frac{1}{N} \sum_{k=1}^M \frac{x_k}{Mp_k} \right]^2 \\ &= \frac{1}{N^2M(M-1)} M \sum_{j=1}^N \frac{y_j^2}{\pi_j} - \\ & \quad \frac{1}{N^2M(M-1)} \left[ M(M-1)\tau^2 + M \sum_{j=1}^N \frac{y_j^2}{\pi_j} \right] \\ &= \frac{1}{N^2(M-1)} \sum_{j=1}^N \frac{y_j^2}{\pi_j} - \\ & \quad \frac{1}{N^2(M-1)} \left[ (M-1)\tau^2 + \sum_{j=1}^N \frac{y_j^2}{\pi_j} \right] \\ &= -\frac{1}{N^2(M-1)} (M-1)\tau^2 \\ &= -\frac{\tau^2}{N^2} \\ &= -\bar{y}^2. \end{aligned} \quad (21)$$

Combining the two estimators  $T_1$  and  $T_2$  we have:

$$\begin{aligned} \mathbb{E}(T_1 + T_2) &= \frac{1}{N} \sum_{j=1}^N y_j^2 - \bar{y}^2 \\ &= \sigma_y^2 \end{aligned}$$

Hence, we have shown that the estimator of  $\sigma_y^2$  is unbiased using the sum of the estimators  $T_1$  in Eq. 14 and  $T_2$  in Eq. 18.

### 3. Hierarchical Models for the Radon Dataset

We compare seven different models of predicting the radon levels in individual houses (indexed by  $i$ ) by county (indexed by  $j$ ). First we fit a pooled model (model 1)

$$\begin{aligned} y_{ij} &= \alpha + x_{ij}\beta + \epsilon_{ij} \\ \epsilon_{ij} &\sim N(0, \sigma_y) \\ \alpha, \beta &\sim N(0, 10) \\ \sigma_y &\sim N^+(0, 1), \end{aligned}$$

where  $y_{ij}$  is the log radon level in house  $i$  in county  $j$ ,  $x_{ij}$  is the floor measurement and  $\epsilon_{ij}$  is  $N^+(0, 1)$  is a truncated Normal distribution at the positive real line. We compare this to a non-pooled model (model 2),

$$\begin{aligned} y_{ij} &= \alpha_j + x_{ij}\beta + \epsilon_{ij} \\ \epsilon_{ij} &\sim N(0, \sigma_y) \\ \alpha_j, \beta &\sim N(0, 10) \\ \sigma_y &\sim N^+(0, 1), \end{aligned}$$

a partially pooled model (model 3),

$$\begin{aligned} y_{ij} &= \alpha_j + \epsilon_{ij} \\ \epsilon_{ij} &\sim N(0, \sigma_y) \\ \alpha_j &\sim N(\mu_\alpha, \sigma_\alpha) \\ \mu_\alpha &\sim N(0, 10) \\ \sigma_y, \sigma_\alpha &\sim N^+(0, 1), \end{aligned}$$

a variable intercept model (model 4),

$$\begin{aligned} y_{ij} &= \alpha_j + x_{ij}\beta + \epsilon_{ij} \\ \epsilon_{ij} &\sim N(0, \sigma_y) \\ \alpha_j &\sim N(\mu_\alpha, \sigma_\alpha) \\ \mu_\alpha, \beta &\sim N(0, 10) \\ \sigma_y, \sigma_\alpha &\sim N^+(0, 1), \end{aligned}$$

a variable slope model (model 5),

$$\begin{aligned} y_{ij} &= \alpha + x_{ij}\beta_j + \epsilon_{ij} \\ \epsilon_{ij} &\sim N(0, \sigma_y) \\ \beta_j &\sim N(\mu_\beta, \sigma_\beta) \\ \mu_\beta, \alpha &\sim N(0, 10) \\ \sigma_y, \sigma_\beta &\sim N^+(0, 1), \end{aligned}$$

a variable intercept and slope model (model 6),

$$\begin{aligned} y_{ij} &= \alpha_j + x_{ij}\beta_j + \epsilon_{ij} \\ \alpha_j &\sim N(\mu_\alpha, \sigma_\alpha) \\ \beta_j &\sim N(\mu_\beta, \sigma_\beta) \\ \mu_\alpha, \mu_\beta &\sim N(0, 10) \\ \sigma_y, \sigma_\alpha, \sigma_\beta &\sim N^+(0, 1), \end{aligned}$$

and finally a model with county level covariates and county level intercepts

$$\begin{aligned} y_{ij} &= \alpha_j + x_{ij}\beta_1 + u_j\beta_2 + \epsilon_{ij} \\ \alpha_j &\sim N(\mu_\alpha, \sigma_\alpha) \\ \beta, \mu_\alpha &\sim N(0, 10) \\ \sigma_y, \sigma_\alpha &\sim N^+(0, 1), \end{aligned}$$

where  $u_j$  is the log uranium level in the county. The Stan code used can be found below.

## 4. Stan models

### 4.1. Linear Regression Model

```
data {
  int <lower=0> N;
  int <lower=0> D;
  matrix [N,D] x ;
  vector [N] y;
}
parameters {
  vector [D] b;
  real <lower=0> sigma;
}
model {
  target += normal_lpdf(y | x * b, sigma);
  target += normal_lpdf(b | 0, 1);
}

generated quantities{
  real log_joint_density_unconstrained;
  vector[N] log_lik;
  // Compute the log likelihoods for loo
  for (n in 1:N) {
    log_lik[n] =
      normal_lpdf(y[n] | x[n,] * b, sigma);
  }
}
```

#### 4.2. Radon pooled model (1)

```

data {
  int<lower=0> N;
  vector[N] x;
  vector[N] y;
  int<lower=0, upper=1> holdout[N];
}

parameters {
  vector[2] beta;
  real<lower=0> sigma_y;
}

model {
  vector[N] mu;

  // priors
  sigma_y ~ normal(0,1);
  beta ~ normal(0,10);

  // likelihood
  mu = beta[1] + beta[2] * x;
  for(n in 1:N){
    if(holdout[n] == 0){
      target +=
        normal_lpdf(y[n] | mu[n], sigma_y);
    }
  }
}

```

#### 4.3. Radon pooled model (2)

```

data {
  int<lower=0> N;
  int<lower=0> J;
  int<lower=1, upper=J> county[N];
  vector[N] x;
  vector[N] y;
  int<lower=0, upper=1> holdout[N];
}

parameters {
  vector[J] a;
  real beta;
  real<lower=0> sigma_y;
}

model {
  vector[N] mu;
  // Prior
  sigma_y ~ normal(0,1);
  a ~ normal(0,10);

  // Likelihood
  for(n in 1:N){
    mu[n] = beta*x[n] + a[county[n]];
    if(holdout[n] == 0){
      target +=
        normal_lpdf(y[n] | mu[n], sigma_y);
    }
  }
}

```



#### 4.4. Radon partially pooled model (3)

```

data {
  int<lower=0> N;
  int<lower=0> J;
  int<lower=1, upper=J> county[N];
  vector[N] y;
  int<lower=0, upper=1> holdout[N];
}
parameters {
  vector[J] a;
  real mu_a;
  real<lower=0> sigma_a;
  real<lower=0> sigma_y;
}
model {
  vector[N] mu;

  // priors
  sigma_y ~ normal(0,1);
  sigma_a ~ normal(0,1);
  mu_a ~ normal(0,10);

  // likelihood
  a ~ normal(mu_a, sigma_a);
  for(n in 1:N){
    mu[n] = a[county[n]];
    if(holdout[n] == 0){
      target +=
        normal_lpdf(y[n]|mu[n], sigma_y);
    }
  }
}

```

#### 4.5. Variable intercept model (4)

```

data {
  int<lower=0> J;
  int<lower=0> N;
  int<lower=1, upper=J> county[N];
  vector[N] x;
  vector[N] y;
  int<lower=0, upper=1> holdout[N];
}
parameters {
  vector[J] a;
  real beta;
  real mu_a;
  real<lower=0> sigma_a;
  real<lower=0> sigma_y;
}
model {
  vector[N] mu;
  // Prior
  sigma_y ~ normal(0,1);
  sigma_a ~ normal(0,1);
  mu_a ~ normal(0,10);
  beta ~ normal(0,10);

  a ~ normal(mu_a, sigma_a);
  for(n in 1:N){
    mu[n] = a[county[n]] + x[n]*beta;
    if(holdout[n] == 0){
      target +=
        normal_lpdf(y[n]|mu[n], sigma_y);
    }
  }
}

```

#### 4.6. Variable slope model (5)

```

data {
  int<lower=0> J;
  int<lower=0> N;
  int<lower=1,upper=J> county[N];
  vector[N] x;
  vector[N] y;
  int<lower=0,upper=1> holdout[N];
}
parameters {
  real a;
  vector[J] beta;
  real mu_beta;
  real<lower=0> sigma_beta;
  real<lower=0> sigma_y;
}
model {
  vector[N] mu;
  // Prior
  a ~ normal(0,10);
  sigma_y ~ normal(0,1);
  sigma_beta ~ normal(0,1);
  mu_beta ~ normal(0,10);

  beta ~ normal(mu_beta,sigma_beta);
  for(n in 1:N){
    mu[n] = a + x[n] * beta[county[n]];
    if(holdout[n] == 0){
      target +=
        normal_lpdf(y[n]|mu[n],sigma_y);
    }
  }
}

```

#### 4.7. Variable intercept and slope model (6)

```

data {
  int<lower=0> N;
  int<lower=0> J;
  vector[N] y;
  vector[N] x;
  int county[N];
  int<lower=0,upper=1> holdout[N];
}
parameters {
  real<lower=0> sigma_y;
  real<lower=0> sigma_a;
  real<lower=0> sigma_beta;
  vector[J] a;
  vector[J] beta;
  real mu_a;
  real mu_beta;
}
model {
  vector[N] mu;
  // Prior
  sigma_y ~ normal(0,1);
  sigma_beta ~ normal(0,1);
  sigma_a ~ normal(0,1);
  mu_a ~ normal(0,10);
  mu_beta ~ normal(0,10);

  a ~ normal(mu_a, sigma_a);
  beta ~ normal(mu_beta, sigma_beta);
  for(n in 1:N){
    mu[n] = a[county[n]] + x[n]*beta[county[n]];
    if(holdout[n] == 0){
      target +=
        normal_lpdf(y[n]|mu[n],sigma_y);
    }
  }
}

```

#### 4.8. Hierarchical intercept model (7)

```
data {
  int<lower=0> J;
  int<lower=0> N;
  int<lower=1, upper=J> county[N];
  vector[N] u;
  vector[N] x;
  vector[N] y;
  int<lower=0, upper=1> holdout[N];
}
parameters {
  vector[J] a;
  vector[2] beta;
  real mu_a;
  real<lower=0> sigma_a;
  real<lower=0> sigma_y;
}
transformed parameters {
}

model {
  vector[N] mu;
  vector[N] m;

  sigma_a ~ normal(0, 1);
  sigma_y ~ normal(0, 1);
  mu_a ~ normal(0, 10);
  beta ~ normal(0, 10);

  a ~ normal(mu_a, sigma_a);
  for(n in 1:N){
    m[n] = a[county[n]] + u[n] * beta[1];
    mu[n] = m[n] + x[n] * beta[2];
    if(holdout[n] == 0){
      target += normal_lpdf(y[n] | mu[n], sigma_y);
    }
  }
}
```

#### 5. R package

The functions are implemented based upon the `loo` package structure as the functions `quick_loo()`, `approx_psis()` and `psis_approximate_posterior()`. An example how to run the code can be found in the documentation for `quick_loo()`. No changes to author lists, versions or date has been changed to preserve anonymity. If accepted, the code will be published open source.
